# Supplementary material for: c-Myc is regulated by HIF-2α in chronic hypoxia and influences sensitivity to 5-FU in colon cancer
Source: PubMed Central journal article supplement (PMC5346686; doi:10.18632/oncotarget.12911), 2016-10-26
Supplement: oncotarget-07-78910-s001.pdf [file oncotarget-07-78910-s001.pdf]

## c-Myc is regulated by HIF-2 $\alpha$ in chronic hypoxia and influences sensitivity to 5-FU in colon cancer

### Supplementary Materials

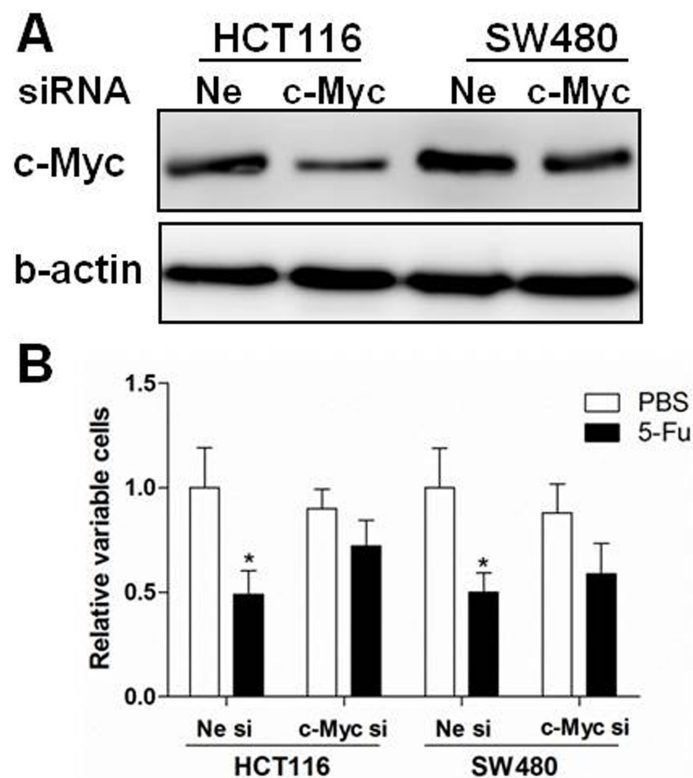

**Supplementary Figure S1: Knockdown of c-Myc impairs chemosensitivity to 5-FU in colon cancer cells.** (A) The expression of c-Myc was measured by Western blotting after transfection with a c-Myc targeted siRNA in HCT116 and SW480 cells. (B) Relative cell viabilities were assessed by MTS after transfection of negative control siRNA or c-Myc targeted siRNA in HCT116 and SW480 cells. Asterisks indicate statistical significance.
